# Supplementary material
Source: publisher figshare collection journal article supplement (https://karger.figshare.com/articles/dataset/_/7819466)
Supplement: Supplementary file 1 [file 1]

## LDV studies

| Study                   | Preparation                                                                                                  | Number of bones                                                                       | Preservation method                                                                           | Max time from death (day)           | Age (years)                                                | Gender                                             | Distance probe inc. tip to TM (mm) | Measurement point                                                             | Vibration isolation table                | Sound level at TM (dB SPL)                   | LDV laser angle (degrees)                                                    | Cosine correction                                                       | Scanned figure                                                                                                                                                                                                                                                                                                                                              | Data                                                                       | Includes variability                                                                          | Lowest frequency (Hz) | Highest frequency (Hz) | Notes                                                                                                                                                                                                                                                                                                                                   | Source for scanning |
|-------------------------|--------------------------------------------------------------------------------------------------------------|---------------------------------------------------------------------------------------|-----------------------------------------------------------------------------------------------|-------------------------------------|------------------------------------------------------------|----------------------------------------------------|------------------------------------|-------------------------------------------------------------------------------|------------------------------------------|----------------------------------------------|------------------------------------------------------------------------------|-------------------------------------------------------------------------|-------------------------------------------------------------------------------------------------------------------------------------------------------------------------------------------------------------------------------------------------------------------------------------------------------------------------------------------------------------|----------------------------------------------------------------------------|-----------------------------------------------------------------------------------------------|-----------------------|------------------------|-----------------------------------------------------------------------------------------------------------------------------------------------------------------------------------------------------------------------------------------------------------------------------------------------------------------------------------------|---------------------|
| Albara et al 2001       | Temporal bone. Specimens were obtained within 48 hours after death using a Schuknecht bone saw.              | 11 (1 of the 12 cadavers had stiff malleus and not included in velocity measurements) | The bones were preserved in 1:10,000 merthiolate solution at 5 °C                             | 6                                   | 36 to 81 (mean 67.9)                                       | 9 male 3 female                                    | 1-2                                | Stapes footplate                                                              | Yes                                      | 60-120 (actual value not given for Figure 7) | Not given                                                                    | Yes                                                                     | Figure 7                                                                                                                                                                                                                                                                                                                                                    | Mean and standard deviation for normalized velocity (mm/s/Pa)              | Yes. Linear                                                                                   | 50                    | 10000                  | Mean $\pm$ 1 standard deviation are not equally spaced mean on log plot. Individual data are shown in Figure 1 and for some frequencies it may be possible to calculate the standard deviation. Care needed though as individual plots greatly overlapping and at many frequencies it's not possible to see individual data discretely. | Publisher's pdf     |
| Asai et al 1999         | Fresh human temporal bones                                                                                   | 22                                                                                    | The bones were preserved in 1:10,000 merthiolate solution at 5 °C                             | 6                                   | 52 to 92 (mean 73.6)                                       | All male                                           | 1-2                                | Stapes footplate, anterior, centre, and posterior                             | Yes by reference to Nishihara et al 1993 | 80                                           | 35 to 50. Not given directly but states methods same as Nishihara et al 1993 | Yes. Not given directly but states methods same as Nishihara et al 1993 | Figure 5 stapes                                                                                                                                                                                                                                                                                                                                             | Figure 5 has mean peak-peak <del>displacement</del> only (no variability). | No                                                                                            | 200                   | 10000                  |                                                                                                                                                                                                                                                                                                                                         | Photocopy           |
| Gan et al 2001          | Group A: 8 (6 fresh) 2 (frozen cadaveric temporal bones; Group B: Temporal bone                              | Group A: 8 (6 fresh) 2 (frozen) Group B: 9                                            | Temporal Group B(bones were preserved in 1:10,000 merthiolate solution in 0.9% saline at 5 °C | 6 (Group B)                         | Group A: 57 to 85 (mean 78.5); Group B: 32 to 96 (mean 64) | Group A: 5 male 3 female; Group B: 8 male 1 female | 2                                  | Centre stapes footplate                                                       | Yes                                      | 90                                           | 30 to 50                                                                     | Not given                                                               | Individual data in Figure 7A (Group A) and Figure 8A (Group B). Mean data in Fig 7A and 7B for Group A and Group B, respectively. Error bars are sometimes smaller than the marker and so can't be used. Fig 7B gives best fit to Rosowski data and used for validation. Pooled individual data from Fig 7A and Fig 7B used for modified Rosowski criteria. | Mean peak-peak <del>displacement</del> and <del>standard error</del>       | Yes. Log scale.                                                                               | 250                   | 8000                   |                                                                                                                                                                                                                                                                                                                                         | Publisher's pdf     |
| Goode et al 1994        | Temporal bone. Specimens were obtained within 48 hours after death using an oscillating Schuknecht bone saw. | 10                                                                                    | The bones were preserved in 1:10,000 merthiolate solution at 5 °C                             | 6                                   | 65 to 80 (mean 72)                                         | All male                                           | Not given                          | Centre of stapes footplate                                                    | Yes                                      | 104                                          | Not given                                                                    | Not given                                                               | Figure 1 124 dB SPL (104 dB SPL doesn't match Rosowski)                                                                                                                                                                                                                                                                                                     | Mean and standard deviation for peak-peak <del>displacement</del>          | Yes. Linear. Last data point at 6.5 kHz from only 9 ears. Not taken into account in analysis. | 400                   | 6000                   |                                                                                                                                                                                                                                                                                                                                         | Photocopy           |
| Hato et al 2001         | Fresh temporal bone. Specimens were obtained within 48 hours after death using a Schuknecht bone saw.        | 15                                                                                    | The bones were preserved in 1:10,000 merthiolate solution at 5 °C                             | 6                                   | 52 to 92 (mean 74.2)                                       | 13 male 2 female                                   | <3                                 | Centre of stapes footplate                                                    | No given                                 | 80                                           | 30 to 50                                                                     | No                                                                      | Figure 3 before buttress removal                                                                                                                                                                                                                                                                                                                            | Mean peak-peak <del>displacement</del> and Standard error                  | Yes. Linear                                                                                   | 100                   | 10000                  |                                                                                                                                                                                                                                                                                                                                         | Publisher's pdf     |
| Hato et al 2003         | Fresh temporal bone. Specimens were obtained within 48 hours after death using a Schuknecht bone saw.        | 10                                                                                    | The bones were preserved in 1:10,000 merthiolate solution at 5 °C                             | 6                                   | 52 to 75 (mean 62.8)                                       | 9 male 1 female                                    | 2                                  | Anterior, posterior, inferior, superior and centre. Figure 3 based on centre. | Not given                                | 80                                           | 50 to 60                                                                     | Yes                                                                     | Figure 3                                                                                                                                                                                                                                                                                                                                                    | Mean peak-peak <del>displacement</del> and standard error                  | Yes. Log                                                                                      | 100                   | 10000                  |                                                                                                                                                                                                                                                                                                                                         | Photocopy           |
| Kurokawa and Goode 1995 | Temporal bone. Specimens were obtained within 48 hours after death using a Schuknecht bone saw.              | 6                                                                                     | The bones were preserved in 1:10,000 merthiolate solution at 5 °C                             | 6                                   | 61 to 74 (mean 68.9)                                       | All male                                           | 2                                  | Stapes footplate                                                              | Yes                                      | 105                                          | 35 to 50                                                                     | Yes                                                                     | Figure 1 stapes                                                                                                                                                                                                                                                                                                                                             | Figure 1 has mean peak-peak <del>displacement</del> only (no variability). | No                                                                                            | 140                   | 9000                   |                                                                                                                                                                                                                                                                                                                                         | Photocopy           |
| Nishihara et al 1993    | Temporal bone. Specimens were obtained within 48 hours after death using a Schuknecht oscillating bone saw.  | 15                                                                                    | The bones were preserved in 1:10,000 merthiolate solution at 5 °C                             | 6                                   | 44 to 84 (mean 67.9)                                       | All male                                           | 2                                  | Centre of stapes footplate                                                    | Yes                                      | 80                                           | 35 to 50                                                                     | Yes                                                                     | Figure 2 stapes                                                                                                                                                                                                                                                                                                                                             | Mean and standard deviation for peak-peak <del>displacement</del>          | Yes. Log                                                                                      | 147                   | 19433                  |                                                                                                                                                                                                                                                                                                                                         | Publisher's pdf     |
| Voss et al 2000         | Temporal bone. Specimens were generally obtained within 24 hours after death using a Schuknecht bone saw.    | 18                                                                                    | Refrigerated (not frozen) at 5 °C in approximately 300 cc saline with 10 ul of 10% Betadine   | Generally made within 5 to 10 days. | Not given                                                  | No given                                           | <2                                 | Stapes footplate or posterior crus of the stapes                              | Not given                                | 50-100                                       | 20 to 50                                                                     | No                                                                      | Fig 4 top right panel                                                                                                                                                                                                                                                                                                                                       | Mean and standard deviation for normalized velocity (mm/s/Pa)              | Yes. Log                                                                                      | 100                   | 4000                   |                                                                                                                                                                                                                                                                                                                                         | Publisher's pdf     |

Studies using video stroboscopy

| Study               | Preparation                                                                                                          | Number of bones | Preservation method                                                        | Max time from death<br>(days) | Age<br>(years)       | Gender    | Distance probe mic tip<br>to TM<br>(mm)                                               | Measurement point | Vibration isolation<br>table                                     | Sound level at TM<br>(dB SPL) | LDV laser angle<br>(degrees) | Cosine correction | Scanned figure         | Data                                                     | Includes variability                                                | Lowest frequency<br>(Hz) | Highest frequency<br>(Hz) | Notes |
|---------------------|----------------------------------------------------------------------------------------------------------------------|-----------------|----------------------------------------------------------------------------|-------------------------------|----------------------|-----------|---------------------------------------------------------------------------------------|-------------------|------------------------------------------------------------------|-------------------------------|------------------------------|-------------------|------------------------|----------------------------------------------------------|---------------------------------------------------------------------|--------------------------|---------------------------|-------|
| Gyo et al 1987      | Temporal bone.<br>Specimens were<br>obtained within<br>24 hours after death<br>using a Schuknecht<br>bone saw.       | 14              | The bones were<br>preserved in 1:10,000<br>merthiolate solution at 5<br>°C | 3                             | 49 to 88 (mean 72.5) | Not given | Unclear. Hole in bony<br>portion of external<br>auditory canal wall 2-3<br>mm from TM | Head of stapes    | Yes                                                              | 124                           | N/A                          | N/A               | Figure 4a stapes head  | Mean peak-peak<br>displacement and<br>standard deviation | Yes. Linear                                                         | 200                      | 4000                      |       |
| Gyo and Goode 1988  | Temporal bone.<br>Specimens were<br>obtained within<br>24 hours after death<br>using a Schuknecht<br>bone saw.       | 7               | The bones were<br>preserved in 1:10,000<br>merthiolate solution at 5<br>°C | 6                             | Not given            | Not given | Unclear. Hole in bony<br>portion of external<br>auditory canal wall 2-3<br>mm from TM | Head of stapes    | Not given, but likely<br>given same methods<br>as Gyo et al 1987 | 124                           | N/A                          | N/A               | Figure 3               | Mean peak-peak<br>displacement and<br>standard deviation | Yes. Linear                                                         | 100                      | 2000                      |       |
| Murakami et al 1997 | Fresh temporal bone.<br>Specimens were<br>obtained within<br>48 hours after death<br>using a Schuknecht<br>bone saw. | 15              | The bones were<br>preserved in 1:10,000<br>merthiolate solution at 5<br>°C | 6                             | 42 to 95 (mean 67.8) | Not given | Not given, but likely to<br>be the same as Gyo et<br>al 1987                          | Head of stapes    | Not given, but likely<br>given same methods<br>as Gyo et al 1987 | 134                           | N/A                          | N/A               | Figure 4 left 0 mm H20 | Mean peak-peak<br>displacement and<br>standard deviation | Yes. Only upper error<br>bar so can't tell whether<br>log or linear | 200                      | 3500                      |       |

Study with measure of RW pressure

| Study                  | Preparation         | Number of bones | Preservation method                                         | Max time from death<br>(days) | Age<br>(years)                                | Gender    | Distance probe mic.<br>tip to TM<br>(mm) | Measurement point   | Vibration isolation<br>table | Sound level at TM<br>(dB SPL) | LDV laser angle<br>(degrees) | Cosine correction | Scanned figure                 | Data                                       | Includes variability | Lowest frequency<br>(Hz) | Highest frequency<br>(Hz) | Notes                                                                                                                                                                                                                                                                          | Source for scanning |
|------------------------|---------------------|-----------------|-------------------------------------------------------------|-------------------------------|-----------------------------------------------|-----------|------------------------------------------|---------------------|------------------------------|-------------------------------|------------------------------|-------------------|--------------------------------|--------------------------------------------|----------------------|--------------------------|---------------------------|--------------------------------------------------------------------------------------------------------------------------------------------------------------------------------------------------------------------------------------------------------------------------------|---------------------|
| Kringlebotn et al 1985 | Human temporal bone | 68              | The temporal bones were stored at a few degrees centigrade. | <6 days for 48/68 ears.       | Not given but can be determined from Figure 6 | Not given | "Close to the eardrum"                   | Round window volume | N/A                          | 105                           | N/A                          | N/A               | Figure 5. Note y axis is in dB | Mean volume displacement per unit pressure | No                   | 50                       | 5000                      | See equation 3 for conversion of volume displacement to mean rms stapes displacement. This then needs to be converted to a normalized velocity. Because the displacement is already an rms value we don't need to scale by $1/\sqrt{2}$ * $\sqrt{2}$ as for other conversions. | Publisher's pdf     |
