# Supplementary material
Source: publisher figshare collection journal article supplement (https://karger.figshare.com/articles/dataset/_/7819466)
Supplement: Supplementary file 2 [file 1]

Archive with 2 entries (2 files):
- AUD495131_sm2.pdf
- AUD495131_sm1.pdf
