# Supplementary material
Source: publisher figshare collection journal article supplement (https://karger.figshare.com/articles/dataset/_/7819466)
Supplement: Supplementary file 2 [file 1 › AUD495131_sm1.pdf]

## Comparison of scanned data from original papers with original and modified Rosowski criteria.

---

Because of the complexity of the plot, it was not possible to scan data from individual studies from the Fig 2 left panel of Rosowski et al 2007. Data were therefore scanned from the original papers. See Morse\_et\_al\_2017\_supplemental\_information\_summary.xlsx for description of data in each study and details of each plot that was scanned.

Scanned data was a mixture of LDV studies (9 studies) and round window sound pressure (1 study)

Raw data for the scans is given in the "scannedFigureData" sheet and plotted in the "scannedFiguresPlots" sheet

This contains a mixture of normalized velocity, peak-peak displacement, and round window volume. These are converted into normalized velocities in sheet "unscaledMETFs".

To convert peak-peak displacements in  $\mu\text{m}$  into a normalized velocity in  $\text{mm/s/Pa}$  the following calculation was applied:

$$H_{TV} = \frac{D_{pp} \times \pi \times f}{1000 \times P \times \sqrt{2}}$$

where  $D_{pp}$  is the peak-peak displacement in  $\mu\text{m}$ ,  
 $P$  is the pressure in Pa  
and  $f$  is the frequency in Hz

To convert round window volume displacement in  $(\text{dB re } 10^{-5} \text{ mm}^3 / \text{Pa})$  in  $\mu\text{m}$  into a normalized velocity in  $\text{mm/s/Pa}$  the following calculation was applied:

$$H_{TV} = \frac{10^{-5} \times 10^{V/20} \times 2 \times \pi \times f}{A}$$

where  $V$  is the volume displacement in  $\text{dB re } 10^{-5} \text{ mm}^3 / \text{Pa}$ ,  
 $f$  is the frequency in Hz  
and  $A$  is the area of the footplate of the stapes in  $\text{mm}^2$ , which was taken to be  $3.2 \text{ mm}^2$  as in the paper by Kringlebotn and Gundersen (1984).

Following Rosowski et al (2007), each normalized velocity was cosine corrected if the original study did not use cosine correction. These data are in sheet "scaledMETFs". By comparison of the left panel of Figure 2 in Rosowski et al to the unscaled plots, we deduce that a cosine correction of  $40^\circ$  was uniformly applied. Although the original data in Aibara et al 2001 was already a normalized plot and the study used cosine correction, the data plotted in the left panel of Fig 2 in Rosowski et al appears to have been scaled by a factor of 0.66. Although the original data in Aibara et al 2001 was already a normalized plot and the study used cosine correction, the data plotted in the left panel of Fig 2 in Rosowski et al appears to have been scaled by a factor of 0.66. We cannot account for this scaling in this figure and from our validation this scaling does not appear to have been used in calculating the original Rosowski criteria. In our paper we have therefore not scaled the data from Aibara et al.

[illegible][illegible]

|      |       |       |       |       |     |     |       |       |       |       |       |       |       |       |       |       |     |     |       |       |       |       |       |       |       |     |     |
|------|-------|-------|-------|-------|-----|-----|-------|-------|-------|-------|-------|-------|-------|-------|-------|-------|-----|-----|-------|-------|-------|-------|-------|-------|-------|-----|-----|
| 2100 | 1.520 | 8.880 | 2.120 | 2.880 | PLN | PLN | 1.680 | 2.000 | 8.000 | 2.600 | 1.400 | 1.600 | 5.900 | 1.200 | 2.400 | 3.800 | PLN | PLN | 4.800 | 2.400 | 7.200 | 3.700 | 2.500 | 2.800 | 1.560 | PLN | PLN |
| 2101 | 1.500 | 8.800 | 2.100 | 2.800 | PLN | PLN | 1.660 | 1.980 | 7.920 | 2.580 | 1.380 | 1.580 | 5.820 | 1.180 | 2.360 | 3.720 | PLN | PLN | 4.720 | 2.380 | 7.160 | 3.680 | 2.480 | 2.780 | 1.540 | PLN | PLN |
| 2102 | 1.480 | 8.720 | 2.080 | 2.720 | PLN | PLN | 1.640 | 1.960 | 7.840 | 2.560 | 1.360 | 1.560 | 5.740 | 1.160 | 2.320 | 3.640 | PLN | PLN | 4.640 | 2.360 | 7.080 | 3.660 | 2.460 | 2.760 | 1.520 | PLN | PLN |
| 2103 | 1.460 | 8.640 | 2.060 | 2.640 | PLN | PLN | 1.620 | 1.940 | 7.760 | 2.540 | 1.340 | 1.540 | 5.660 | 1.140 | 2.280 | 3.560 | PLN | PLN | 4.560 | 2.340 | 7.000 | 3.640 | 2.440 | 2.740 | 1.500 | PLN | PLN |
| 2104 | 1.440 | 8.560 | 2.040 | 2.560 | PLN | PLN | 1.600 | 1.920 | 7.680 | 2.520 | 1.320 | 1.520 | 5.580 | 1.120 | 2.240 | 3.480 | PLN | PLN | 4.480 | 2.320 | 6.920 | 3.620 | 2.420 | 2.720 | 1.480 | PLN | PLN |
| 2105 | 1.420 | 8.480 | 2.020 | 2.480 | PLN | PLN | 1.580 | 1.900 | 7.600 | 2.500 | 1.300 | 1.500 | 5.500 | 1.100 | 2.200 | 3.400 | PLN | PLN | 4.400 | 2.300 | 6.840 | 3.600 | 2.400 | 2.700 | 1.460 | PLN | PLN |
| 2106 | 1.400 | 8.400 | 2.000 | 2.400 | PLN | PLN | 1.560 | 1.880 | 7.520 | 2.480 | 1.280 | 1.480 | 5.420 | 1.080 | 2.160 | 3.320 | PLN | PLN | 4.320 | 2.280 | 6.760 | 3.580 | 2.380 | 2.680 | 1.440 | PLN | PLN |
| 2107 | 1.380 | 8.320 | 1.980 | 2.320 | PLN | PLN | 1.540 | 1.860 | 7.440 | 2.460 | 1.260 | 1.460 | 5.340 | 1.060 | 2.120 | 3.240 | PLN | PLN | 4.240 | 2.260 | 6.680 | 3.560 | 2.360 | 2.660 | 1.420 | PLN | PLN |
| 2108 | 1.360 | 8.240 | 1.960 | 2.240 | PLN | PLN | 1.520 | 1.840 | 7.360 | 2.440 | 1.240 | 1.440 | 5.260 | 1.040 | 2.080 | 3.160 | PLN | PLN | 4.160 | 2.240 | 6.600 | 3.540 | 2.340 | 2.640 | 1.400 | PLN | PLN |
| 2109 | 1.340 | 8.160 | 1.940 | 2.160 | PLN | PLN | 1.500 | 1.820 | 7.280 | 2.420 | 1.220 | 1.420 | 5.180 | 1.020 | 2.040 | 3.080 | PLN | PLN | 4.080 | 2.220 | 6.520 | 3.520 | 2.320 | 2.620 | 1.380 | PLN | PLN |
| 2110 | 1.320 | 8.080 | 1.920 | 2.080 | PLN | PLN | 1.480 | 1.800 | 7.200 | 2.400 | 1.200 | 1.400 | 5.100 | 1.000 | 2.000 | 3.000 | PLN | PLN | 4.000 | 2.200 | 6.440 | 3.500 | 2.300 | 2.600 | 1.360 | PLN | PLN |
| 2111 | 1.300 | 8.000 | 1.900 | 2.000 | PLN | PLN | 1.460 | 1.780 | 7.120 | 2.380 | 1.180 | 1.380 | 5.020 | 0.980 | 1.960 | 2.920 | PLN | PLN | 3.920 | 2.180 | 6.360 | 3.480 | 2.280 | 2.580 | 1.340 | PLN | PLN |
| 2112 | 1.280 | 7.920 | 1.880 | 1.920 | PLN | PLN | 1.440 | 1.760 | 7.040 | 2.360 | 1.160 | 1.360 | 4.940 | 0.960 | 1.920 | 2.840 | PLN | PLN | 3.840 | 2.160 | 6.280 | 3.460 | 2.260 | 2.560 | 1.320 | PLN | PLN |
| 2113 | 1.260 | 7.840 | 1.860 | 1.840 | PLN | PLN | 1.420 | 1.740 | 6.960 | 2.340 | 1.140 | 1.340 | 4.860 | 0.940 | 1.880 | 2.760 | PLN | PLN | 3.760 | 2.140 | 6.200 | 3.440 | 2.240 | 2.540 | 1.300 | PLN | PLN |
| 2114 | 1.240 | 7.760 | 1.840 | 1.760 | PLN | PLN | 1.400 | 1.720 | 6.880 | 2.320 | 1.120 | 1.320 | 4.780 | 0.920 | 1.840 | 2.680 | PLN | PLN | 3.680 | 2.120 | 6.120 | 3.420 | 2.220 | 2.520 | 1.280 | PLN | PLN |
| 2115 | 1.220 | 7.680 | 1.820 | 1.680 | PLN | PLN | 1.380 | 1.700 | 6.800 | 2.300 | 1.100 | 1.300 | 4.700 | 0.900 | 1.800 | 2.600 | PLN | PLN | 3.600 | 2.100 | 6.040 | 3.400 | 2.200 | 2.500 | 1.260 | PLN | PLN |
| 2116 | 1.200 | 7.600 | 1.800 | 1.600 | PLN | PLN | 1.360 | 1.680 | 6.720 | 2.280 | 1.080 | 1.280 | 4.620 | 0.880 | 1.760 | 2.520 | PLN | PLN | 3.520 | 2.080 | 5.960 | 3.380 | 2.180 | 2.480 | 1.240 | PLN | PLN |
| 2117 | 1.180 | 7.520 | 1.780 | 1.520 | PLN | PLN | 1.340 | 1.660 | 6.640 | 2.260 | 1.060 | 1.260 | 4.540 | 0.860 | 1.720 | 2.440 | PLN | PLN | 3.440 | 2.060 | 5.880 | 3.360 | 2.160 | 2.460 | 1.220 | PLN | PLN |
| 2118 | 1.160 | 7.440 | 1.760 | 1.440 | PLN | PLN | 1.320 | 1.640 | 6.560 | 2.240 | 1.040 | 1.240 | 4.460 | 0.840 | 1.680 | 2.360 | PLN | PLN | 3.360 | 2.040 | 5.800 | 3.340 | 2.140 | 2.440 | 1.200 | PLN | PLN |
| 2119 | 1.140 | 7.360 | 1.740 | 1.360 | PLN | PLN | 1.300 | 1.620 | 6.480 | 2.220 | 1.020 | 1.220 | 4.380 | 0.820 | 1.640 | 2.280 | PLN | PLN | 3.280 | 2.020 | 5.720 | 3.320 | 2.120 | 2.420 | 1.180 | PLN | PLN |
| 2120 | 1.120 | 7.280 | 1.720 | 1.280 | PLN | PLN | 1.280 | 1.600 | 6.400 | 2.200 | 1.000 | 1.200 | 4.300 | 0.800 | 1.600 | 2.200 | PLN | PLN | 3.200 | 2.000 | 5.640 | 3.300 | 2.100 | 2.400 | 1.160 | PLN | PLN |
| 2121 | 1.100 | 7.200 | 1.700 | 1.200 | PLN | PLN | 1.260 | 1.580 | 6.320 | 2.180 | 0.980 | 1.180 | 4.220 | 0.780 | 1.560 | 2.120 | PLN | PLN | 3.120 | 1.980 | 5.560 | 3.280 | 2.080 | 2.380 | 1.140 | PLN | PLN |
| 2122 | 1.080 | 7.120 | 1.680 | 1.120 | PLN | PLN | 1.240 | 1.560 | 6.240 | 2.160 | 0.960 | 1.160 | 4.140 | 0.760 | 1.520 | 2.040 | PLN | PLN | 3.040 | 1.960 | 5.480 | 3.260 | 2.060 | 2.360 | 1.120 | PLN | PLN |
| 2123 | 1.060 | 7.040 | 1.660 | 1.040 | PLN | PLN | 1.220 | 1.540 | 6.160 | 2.140 | 0.940 | 1.140 | 4.060 | 0.740 | 1.480 | 1.960 | PLN | PLN | 2.960 | 1.940 | 5.400 | 3.240 | 2.040 | 2.340 | 1.100 | PLN | PLN |
| 2124 | 1.040 | 6.960 | 1.640 | 0.960 | PLN | PLN | 1.200 | 1.520 | 6.080 | 2.120 | 0.920 | 1.120 | 3.980 | 0.720 | 1.440 | 1.880 | PLN | PLN | 2.880 | 1.920 | 5.320 | 3.220 | 2.020 | 2.320 | 1.080 | PLN | PLN |
| 2125 | 1.020 | 6.880 | 1.620 | 0.880 | PLN | PLN | 1.180 | 1.500 | 6.000 | 2.100 | 0.900 | 1.100 | 3.900 | 0.700 | 1.400 | 1.800 | PLN | PLN | 2.800 | 1.900 | 5.240 | 3.200 | 2.000 | 2.300 | 1.060 | PLN | PLN |
| 2126 | 1.000 | 6.800 | 1.600 | 0.800 | PLN | PLN | 1.160 | 1.480 | 5.920 | 2.080 | 0.880 | 1.080 | 3.820 | 0.680 | 1.360 | 1.720 | PLN | PLN | 2.720 | 1.880 | 5.160 | 3.180 | 1.980 | 2.280 | 1.040 | PLN | PLN |
| 2127 | 0.980 | 6.720 | 1.580 | 0.720 | PLN | PLN | 1.140 | 1.460 | 5.840 | 2.060 | 0.860 | 1.060 | 3.740 | 0.660 | 1.320 | 1.640 | PLN | PLN | 2.640 | 1.860 | 5.080 | 3.160 | 1.960 | 2.260 | 1.020 | PLN | PLN |
| 2128 | 0.960 | 6.640 | 1.560 | 0.640 | PLN | PLN | 1.120 | 1.440 | 5.760 | 2.040 | 0.840 | 1.040 | 3.660 | 0.640 | 1.280 | 1.560 | PLN | PLN | 2.560 | 1.840 | 5.000 | 3.140 | 1.940 | 2.240 | 1.000 | PLN | PLN |
| 2129 | 0.940 | 6.560 | 1.540 | 0.560 | PLN | PLN | 1.100 | 1.420 | 5.680 | 2.020 | 0.820 | 1.020 | 3.580 | 0.620 | 1.240 | 1.480 | PLN | PLN | 2.480 | 1.820 | 4.920 | 3.120 | 1.920 | 2.220 | 0.980 | PLN | PLN |
| 2130 | 0.920 | 6.480 | 1.520 | 0.480 | PLN | PLN | 1.080 | 1.400 | 5.600 | 2.000 | 0.800 | 1.000 | 3.500 | 0.600 | 1.200 | 1.400 | PLN | PLN | 2.400 | 1.800 | 4.840 | 3.100 | 1.900 | 2.200 | 0.960 | PLN | PLN |
| 2131 | 0.900 | 6.400 | 1.500 | 0.400 | PLN | PLN | 1.060 | 1.380 | 5.520 | 1.980 | 0.780 | 0.980 | 3.420 | 0.580 | 1.160 | 1.320 | PLN | PLN | 2.320 | 1.780 | 4.760 | 3.080 | 1.880 | 2.180 | 0.940 | PLN | PLN |
| 2132 | 0.880 | 6.320 | 1.480 | 0.320 | PLN | PLN | 1.040 | 1.360 | 5.440 | 1.960 | 0.760 | 0.960 | 3.340 | 0.560 | 1.120 | 1.240 | PLN | PLN | 2.240 | 1.760 | 4.680 | 3.060 | 1.860 | 2.160 | 0.920 | PLN | PLN |
| 2133 | 0.860 | 6.240 | 1.460 | 0.240 | PLN | PLN | 1.020 | 1.340 | 5.360 | 1.940 | 0.740 | 0.940 | 3.260 | 0.540 | 1.080 | 1.160 | PLN | PLN | 2.160 | 1.740 | 4.600 | 3.040 | 1.840 | 2.140 | 0.900 | PLN | PLN |
| 2134 | 0.840 | 6.160 | 1.440 | 0.160 | PLN | PLN | 1.000 | 1.320 | 5.280 | 1.920 | 0.720 | 0.920 | 3.180 | 0.520 | 1.040 | 1.080 | PLN | PLN | 2.080 | 1.720 | 4.520 | 3.020 | 1.820 | 2.120 | 0.880 | PLN | PLN |
| 2135 | 0.820 | 6.080 | 1.420 | 0.080 | PLN | PLN | 0.980 | 1.300 | 5.200 | 1.900 | 0.700 | 0.900 | 3.100 | 0.500 | 1.000 | 1.000 | PLN | PLN | 2.000 | 1.700 | 4.440 | 3.000 | 1.800 | 2.100 | 0.860 | PLN | PLN |
| 2136 | 0.800 | 6.000 | 1.400 | 0.000 | PLN | PLN | 0.960 | 1.280 | 5.120 | 1.880 | 0.680 | 0.880 | 3.020 | 0.480 | 0.960 | 0.920 | PLN | PLN | 1.920 | 1.680 | 4.360 | 2.980 | 1.780 | 2.080 | 0.840 | PLN | PLN |
| 2137 | 0.780 | 5.920 | 1.380 | 0.000 | PLN | PLN | 0.940 | 1.260 | 5.040 | 1.860 | 0.660 | 0.860 | 2.940 | 0.460 | 0.920 | 0.840 | PLN | PLN | 1.840 | 1.660 | 4.280 | 2.960 | 1.760 | 2.060 | 0.820 | PLN | PLN |
| 2138 | 0.760 | 5.840 | 1.360 | 0.000 | PLN | PLN | 0.920 | 1.240 | 4.960 | 1.840 | 0.640 | 0.840 | 2.860 | 0.440 | 0.880 | 0.760 | PLN | PLN | 1.760 | 1.640 | 4.200 | 2.940 | 1.740 | 2.040 | 0.800 | PLN | PLN |
| 2139 | 0.740 | 5.760 | 1.340 | 0.000 | PLN | PLN | 0.900 | 1.220 | 4.880 | 1.820 | 0.620 | 0.820 | 2.780 | 0.420 | 0.840 | 0.680 | PLN | PLN | 1.680 | 1.620 | 4.120 | 2.920 | 1.720 | 2.020 | 0.780 | PLN | PLN |
| 2140 | 0.720 | 5.680 | 1.320 | 0.000 | PLN | PLN | 0.880 | 1.200 | 4.800 | 1.800 | 0.600 | 0.800 | 2.700 | 0.400 | 0.800 | 0.600 | PLN | PLN | 1.600 | 1.600 | 4.040 | 2.900 | 1.700 | 2.000 | 0.760 | PLN | PLN |
| 2141 | 0.700 | 5.600 | 1.300 | 0.000 | PLN | PLN | 0.860 | 1.180 | 4.720 | 1.780 | 0.580 | 0.780 | 2.620 | 0.380 | 0.760 | 0.520 | PLN | PLN | 1.520 | 1.580 | 3.960 | 2.880 | 1.680 | 1.980 | 0.740 | PLN | PLN |
| 2142 | 0.680 | 5.520 | 1.280 | 0.000 | PLN | PLN | 0.840 | 1.160 | 4.640 | 1.760 | 0.560 | 0.760 | 2.540 | 0.360 | 0.720 | 0.440 | PLN | PLN | 1.440 | 1.560 | 3.880 | 2.860 | 1.660 | 1.960 | 0.720 | PLN | PLN |
| 2143 | 0.660 | 5.440 | 1.260 | 0.000 | PLN | PLN | 0.820 | 1.140 | 4.560 | 1.740 | 0.540 | 0.740 | 2.460 | 0.340 | 0.680 | 0.360 | PLN | PLN | 1.360 | 1.540 | 3.800 | 2.840 | 1.640 | 1.940 | 0.700 | PLN | PLN |
| 2144 | 0.640 | 5.360 | 1.240 | 0.000 | PLN | PLN | 0.800 | 1.120 | 4.480 | 1.720 | 0.520 | 0.720 | 2.380 | 0.320 | 0.640 | 0.280 | PLN | PLN | 1.280 | 1.520 | 3.720 | 2.820 | 1.620 | 1.920 | 0.680 | PLN | PLN |
| 2145 | 0.620 | 5.280 | 1.220 | 0.000 | PLN | PLN | 0.780 | 1.100 | 4.400 | 1.700 | 0.500 | 0.700 | 2.300 | 0.300 | 0.600 | 0.200 | PLN | PLN | 1.200 | 1.500 | 3.640 | 2.800 | 1.600 | 1.900 | 0.660 | PLN | PLN |
| 2146 | 0.600 | 5.200 | 1.200 | 0.000 | PLN | PLN | 0.760 | 1.080 | 4.320 | 1.680 | 0.480 | 0.680 | 2.220 | 0.280 | 0.560 | 0.120 | PLN | PLN | 1.120 | 1     |       |       |       |       |       |     |     |

Plots of scanned data

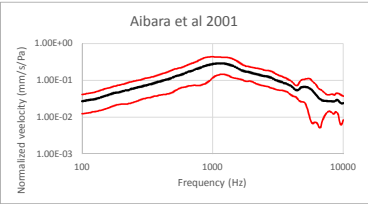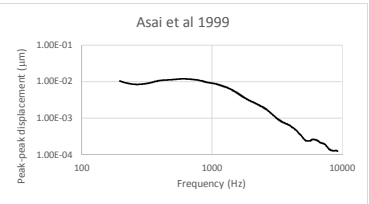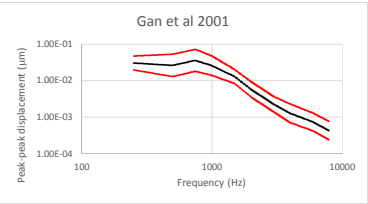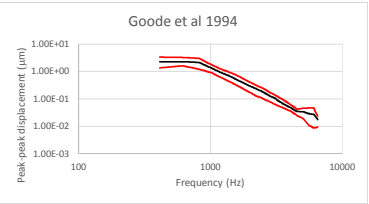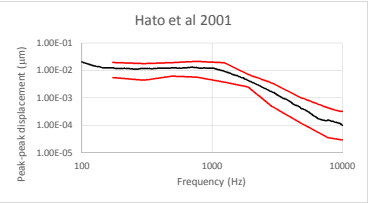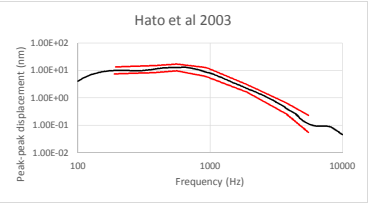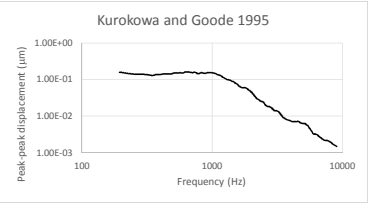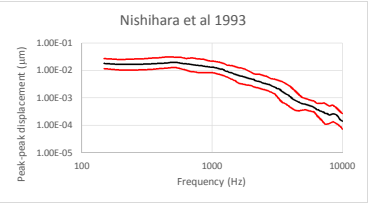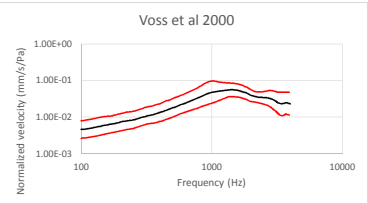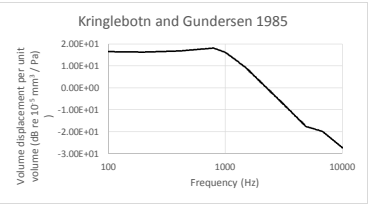



Scaled middle-ear transfer functions with inferred scaling applied by Rosowski

[illegible]

Middle-ear transfer functions with and without scaling

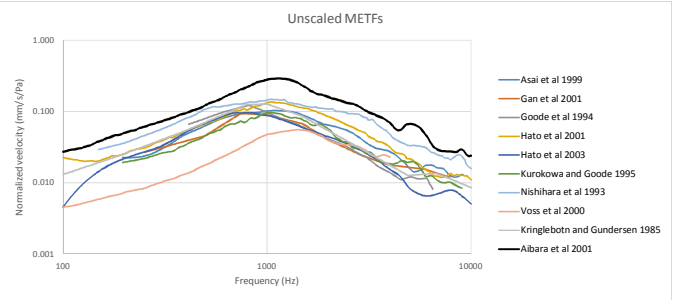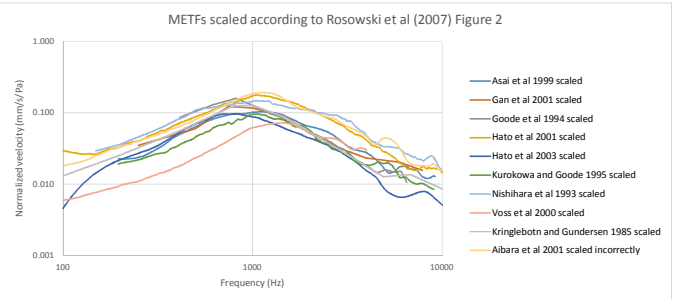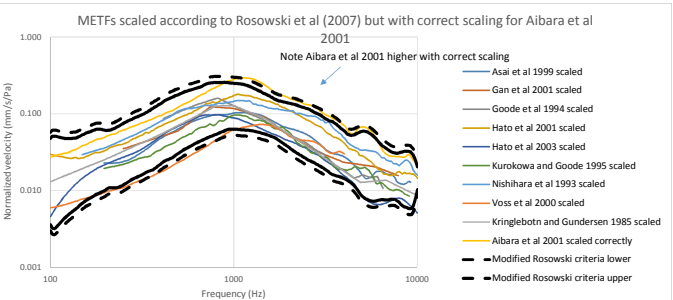

Summary of regional data and trends relative to health care utilization

| Region        | Population (2019) | Healthcare Utilization (2019) | Healthcare Utilization (2020) | Healthcare Utilization (2021) | Healthcare Utilization (2022) |
|---------------|-------------------|-------------------------------|-------------------------------|-------------------------------|-------------------------------|
| North America | 1,000,000,000     | 1,000,000,000                 | 1,000,000,000                 | 1,000,000,000                 | 1,000,000,000                 |
| Europe        | 750,000,000       | 750,000,000                   | 750,000,000                   | 750,000,000                   | 750,000,000                   |
| Asia          | 4,500,000,000     | 4,500,000,000                 | 4,500,000,000                 | 4,500,000,000                 | 4,500,000,000                 |
| Africa        | 1,200,000,000     | 1,200,000,000                 | 1,200,000,000                 | 1,200,000,000                 | 1,200,000,000                 |
| South America | 450,000,000       | 450,000,000                   | 450,000,000                   | 450,000,000                   | 450,000,000                   |
| Oceania       | 45,000,000        | 45,000,000                    | 45,000,000                    | 45,000,000                    | 45,000,000                    |

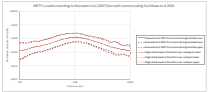

Scanned data for original Kosowski criteria

| Table 1. The number of cases and deaths by age group and sex, 2019-2020 |        |                 |
|-------------------------------------------------------------------------|--------|-----------------|
| Age group                                                               | Sex    | Number of cases |
| 0-4                                                                     | Male   | 120             |
| 0-4                                                                     | Female | 110             |
| 5-9                                                                     | Male   | 130             |
| 5-9                                                                     | Female | 120             |
| 10-14                                                                   | Male   | 140             |
| 10-14                                                                   | Female | 130             |
| 15-19                                                                   | Male   | 150             |
| 15-19                                                                   | Female | 140             |
| 20-24                                                                   | Male   | 160             |
| 20-24                                                                   | Female | 150             |
| 25-29                                                                   | Male   | 170             |
| 25-29                                                                   | Female | 160             |
| 30-34                                                                   | Male   | 180             |
| 30-34                                                                   | Female | 170             |
| 35-39                                                                   | Male   | 190             |
| 35-39                                                                   | Female | 180             |
| 40-44                                                                   | Male   | 200             |
| 40-44                                                                   | Female | 190             |
| 45-49                                                                   | Male   | 210             |
| 45-49                                                                   | Female | 200             |
| 50-54                                                                   | Male   | 220             |
| 50-54                                                                   | Female | 210             |
| 55-59                                                                   | Male   | 230             |
| 55-59                                                                   | Female | 220             |
| 60-64                                                                   | Male   | 240             |
| 60-64                                                                   | Female | 230             |
| 65-69                                                                   | Male   | 250             |
| 65-69                                                                   | Female | 240             |
| 70-74                                                                   | Male   | 260             |
| 70-74                                                                   | Female | 250             |
| 75-79                                                                   | Male   | 270             |
| 75-79                                                                   | Female | 260             |
| 80-84                                                                   | Male   | 280             |
| 80-84                                                                   | Female | 270             |
| 85-89                                                                   | Male   | 290             |
| 85-89                                                                   | Female | 280             |
| 90-94                                                                   | Male   | 300             |
| 90-94                                                                   | Female | 290             |
| 95-99                                                                   | Male   | 310             |
| 95-99                                                                   | Female | 300             |
| 100+                                                                    | Male   | 320             |
| 100+                                                                    | Female | 310             |

## Modified Rosowski criteria

| Frequency (Hz) | Rosowski et al 2007 Fig 2 scanned<br>Modified criteria with 20% larger confidence intervals<br>Normalized velocity (mm/s/Pa) |                 |                 |
|----------------|------------------------------------------------------------------------------------------------------------------------------|-----------------|-----------------|
|                | Mean                                                                                                                         | Lower error bar | Upper error bar |
|                |                                                                                                                              |                 |                 |
| 100            | 1.22E-02                                                                                                                     | 2.96E-03        | 5.71E-02        |
| 102            | 1.23E-02                                                                                                                     | 2.71E-03        | 6.02E-02        |
| 103            | 1.24E-02                                                                                                                     | 2.67E-03        | 6.12E-02        |
| 105            | 1.25E-02                                                                                                                     | 2.64E-03        | 6.13E-02        |
| 107            | 1.27E-02                                                                                                                     | 2.73E-03        | 6.08E-02        |
| 109            | 1.28E-02                                                                                                                     | 2.86E-03        | 6.00E-02        |
| 111            | 1.30E-02                                                                                                                     | 2.99E-03        | 5.92E-02        |
| 113            | 1.33E-02                                                                                                                     | 3.13E-03        | 5.85E-02        |
| 115            | 1.35E-02                                                                                                                     | 3.28E-03        | 5.79E-02        |
| 117            | 1.37E-02                                                                                                                     | 3.42E-03        | 5.75E-02        |
| 119            | 1.39E-02                                                                                                                     | 3.57E-03        | 5.72E-02        |
| 121            | 1.41E-02                                                                                                                     | 3.72E-03        | 5.70E-02        |
| 123            | 1.44E-02                                                                                                                     | 3.86E-03        | 5.69E-02        |
| 125            | 1.46E-02                                                                                                                     | 4.00E-03        | 5.69E-02        |
| 127            | 1.48E-02                                                                                                                     | 4.14E-03        | 5.70E-02        |
| 129            | 1.51E-02                                                                                                                     | 4.27E-03        | 5.71E-02        |
| 132            | 1.54E-02                                                                                                                     | 4.45E-03        | 5.72E-02        |
| 134            | 1.57E-02                                                                                                                     | 4.56E-03        | 5.74E-02        |
| 136            | 1.60E-02                                                                                                                     | 4.67E-03        | 5.76E-02        |
| 139            | 1.65E-02                                                                                                                     | 4.87E-03        | 5.84E-02        |
| 141            | 1.68E-02                                                                                                                     | 5.02E-03        | 5.92E-02        |
| 144            | 1.74E-02                                                                                                                     | 5.25E-03        | 6.05E-02        |
| 146            | 1.77E-02                                                                                                                     | 5.41E-03        | 6.15E-02        |
| 149            | 1.83E-02                                                                                                                     | 5.66E-03        | 6.31E-02        |
| 151            | 1.87E-02                                                                                                                     | 5.83E-03        | 6.42E-02        |
| 154            | 1.92E-02                                                                                                                     | 6.05E-03        | 6.56E-02        |
| 157            | 1.97E-02                                                                                                                     | 6.23E-03        | 6.70E-02        |
| 159            | 2.01E-02                                                                                                                     | 6.34E-03        | 6.78E-02        |

|     |          |          |          |
|-----|----------|----------|----------|
| 162 | 2.06E-02 | 6.46E-03 | 6.90E-02 |
| 165 | 2.10E-02 | 6.61E-03 | 7.01E-02 |
| 168 | 2.14E-02 | 6.79E-03 | 7.11E-02 |
| 171 | 2.18E-02 | 6.97E-03 | 7.22E-02 |
| 174 | 2.22E-02 | 7.15E-03 | 7.34E-02 |
| 177 | 2.26E-02 | 7.32E-03 | 7.49E-02 |
| 180 | 2.30E-02 | 7.47E-03 | 7.52E-02 |
| 183 | 2.33E-02 | 7.62E-03 | 7.54E-02 |
| 186 | 2.35E-02 | 7.74E-03 | 7.51E-02 |
| 189 | 2.38E-02 | 7.86E-03 | 7.46E-02 |
| 193 | 2.41E-02 | 8.04E-03 | 7.36E-02 |
| 196 | 2.43E-02 | 8.17E-03 | 7.29E-02 |
| 200 | 2.46E-02 | 8.44E-03 | 7.26E-02 |
| 203 | 2.48E-02 | 8.70E-03 | 7.28E-02 |
| 207 | 2.50E-02 | 8.92E-03 | 7.31E-02 |
| 210 | 2.52E-02 | 9.02E-03 | 7.35E-02 |
| 214 | 2.55E-02 | 9.06E-03 | 7.41E-02 |
| 218 | 2.58E-02 | 9.05E-03 | 7.50E-02 |
| 221 | 2.60E-02 | 9.05E-03 | 7.61E-02 |
| 225 | 2.64E-02 | 9.05E-03 | 7.78E-02 |
| 229 | 2.67E-02 | 9.06E-03 | 7.95E-02 |
| 233 | 2.71E-02 | 9.11E-03 | 8.12E-02 |
| 237 | 2.75E-02 | 9.22E-03 | 8.33E-02 |
| 241 | 2.79E-02 | 9.35E-03 | 8.55E-02 |
| 246 | 2.85E-02 | 9.58E-03 | 8.81E-02 |
| 250 | 2.90E-02 | 9.80E-03 | 8.99E-02 |
| 254 | 2.95E-02 | 1.00E-02 | 9.15E-02 |
| 259 | 3.02E-02 | 1.04E-02 | 9.37E-02 |
| 263 | 3.08E-02 | 1.06E-02 | 9.55E-02 |
| 268 | 3.15E-02 | 1.09E-02 | 9.74E-02 |
| 273 | 3.23E-02 | 1.13E-02 | 9.94E-02 |
| 277 | 3.29E-02 | 1.15E-02 | 1.01E-01 |
| 282 | 3.38E-02 | 1.17E-02 | 1.03E-01 |
| 287 | 3.45E-02 | 1.20E-02 | 1.05E-01 |

|     |          |          |          |
|-----|----------|----------|----------|
| 292 | 3.53E-02 | 1.22E-02 | 1.07E-01 |
| 297 | 3.60E-02 | 1.24E-02 | 1.09E-01 |
| 302 | 3.67E-02 | 1.27E-02 | 1.11E-01 |
| 308 | 3.75E-02 | 1.29E-02 | 1.13E-01 |
| 313 | 3.82E-02 | 1.32E-02 | 1.14E-01 |
| 319 | 3.90E-02 | 1.35E-02 | 1.17E-01 |
| 324 | 3.97E-02 | 1.38E-02 | 1.19E-01 |
| 330 | 4.06E-02 | 1.41E-02 | 1.23E-01 |
| 336 | 4.15E-02 | 1.44E-02 | 1.26E-01 |
| 342 | 4.24E-02 | 1.47E-02 | 1.29E-01 |
| 347 | 4.30E-02 | 1.49E-02 | 1.32E-01 |
| 354 | 4.40E-02 | 1.51E-02 | 1.36E-01 |
| 360 | 4.48E-02 | 1.54E-02 | 1.40E-01 |
| 366 | 4.56E-02 | 1.57E-02 | 1.43E-01 |
| 372 | 4.66E-02 | 1.61E-02 | 1.47E-01 |
| 379 | 4.78E-02 | 1.67E-02 | 1.50E-01 |
| 386 | 4.91E-02 | 1.73E-02 | 1.54E-01 |
| 392 | 5.03E-02 | 1.78E-02 | 1.58E-01 |
| 399 | 5.18E-02 | 1.85E-02 | 1.62E-01 |
| 406 | 5.34E-02 | 1.91E-02 | 1.67E-01 |
| 413 | 5.51E-02 | 1.96E-02 | 1.72E-01 |
| 420 | 5.67E-02 | 2.01E-02 | 1.77E-01 |
| 428 | 5.83E-02 | 2.06E-02 | 1.81E-01 |
| 435 | 5.96E-02 | 2.09E-02 | 1.84E-01 |
| 443 | 6.10E-02 | 2.13E-02 | 1.88E-01 |
| 451 | 6.23E-02 | 2.16E-02 | 1.91E-01 |
| 459 | 6.36E-02 | 2.21E-02 | 1.95E-01 |
| 467 | 6.48E-02 | 2.27E-02 | 1.99E-01 |
| 475 | 6.60E-02 | 2.34E-02 | 2.02E-01 |
| 483 | 6.73E-02 | 2.40E-02 | 2.06E-01 |
| 491 | 6.87E-02 | 2.48E-02 | 2.09E-01 |
| 500 | 7.05E-02 | 2.55E-02 | 2.13E-01 |
| 509 | 7.21E-02 | 2.62E-02 | 2.18E-01 |
| 518 | 7.38E-02 | 2.69E-02 | 2.22E-01 |

|     |          |          |          |
|-----|----------|----------|----------|
| 527 | 7.53E-02 | 2.76E-02 | 2.25E-01 |
| 536 | 7.68E-02 | 2.83E-02 | 2.29E-01 |
| 545 | 7.82E-02 | 2.89E-02 | 2.33E-01 |
| 555 | 7.96E-02 | 2.96E-02 | 2.37E-01 |
| 564 | 8.09E-02 | 3.02E-02 | 2.40E-01 |
| 574 | 8.25E-02 | 3.09E-02 | 2.43E-01 |
| 584 | 8.44E-02 | 3.17E-02 | 2.46E-01 |
| 595 | 8.63E-02 | 3.25E-02 | 2.49E-01 |
| 605 | 8.79E-02 | 3.32E-02 | 2.51E-01 |
| 616 | 8.96E-02 | 3.40E-02 | 2.54E-01 |
| 626 | 9.13E-02 | 3.46E-02 | 2.57E-01 |
| 637 | 9.31E-02 | 3.52E-02 | 2.61E-01 |
| 648 | 9.49E-02 | 3.59E-02 | 2.64E-01 |
| 660 | 9.69E-02 | 3.66E-02 | 2.69E-01 |
| 671 | 9.85E-02 | 3.73E-02 | 2.74E-01 |
| 683 | 1.00E-01 | 3.80E-02 | 2.80E-01 |
| 695 | 1.02E-01 | 3.89E-02 | 2.86E-01 |
| 707 | 1.03E-01 | 3.97E-02 | 2.92E-01 |
| 719 | 1.05E-01 | 4.04E-02 | 2.96E-01 |
| 732 | 1.06E-01 | 4.11E-02 | 2.99E-01 |
| 745 | 1.07E-01 | 4.19E-02 | 3.01E-01 |
| 758 | 1.08E-01 | 4.25E-02 | 3.03E-01 |
| 771 | 1.10E-01 | 4.31E-02 | 3.04E-01 |
| 785 | 1.11E-01 | 4.39E-02 | 3.05E-01 |
| 798 | 1.12E-01 | 4.46E-02 | 3.06E-01 |
| 812 | 1.13E-01 | 4.53E-02 | 3.06E-01 |
| 826 | 1.14E-01 | 4.61E-02 | 3.07E-01 |
| 841 | 1.15E-01 | 4.69E-02 | 3.07E-01 |
| 856 | 1.16E-01 | 4.78E-02 | 3.08E-01 |
| 871 | 1.17E-01 | 4.86E-02 | 3.08E-01 |
| 886 | 1.18E-01 | 4.94E-02 | 3.08E-01 |
| 901 | 1.19E-01 | 5.03E-02 | 3.08E-01 |
| 917 | 1.20E-01 | 5.12E-02 | 3.06E-01 |
| 933 | 1.21E-01 | 5.18E-02 | 3.05E-01 |

|      |          |          |          |
|------|----------|----------|----------|
| 949  | 1.22E-01 | 5.21E-02 | 3.03E-01 |
| 966  | 1.23E-01 | 5.23E-02 | 3.01E-01 |
| 983  | 1.23E-01 | 5.24E-02 | 3.00E-01 |
| 1000 | 1.23E-01 | 5.24E-02 | 2.99E-01 |
| 1017 | 1.23E-01 | 5.23E-02 | 2.97E-01 |
| 1035 | 1.23E-01 | 5.21E-02 | 2.97E-01 |
| 1053 | 1.23E-01 | 5.19E-02 | 2.96E-01 |
| 1072 | 1.23E-01 | 5.16E-02 | 2.94E-01 |
| 1091 | 1.22E-01 | 5.14E-02 | 2.93E-01 |
| 1110 | 1.21E-01 | 5.13E-02 | 2.91E-01 |
| 1129 | 1.20E-01 | 5.12E-02 | 2.88E-01 |
| 1149 | 1.19E-01 | 5.11E-02 | 2.85E-01 |
| 1169 | 1.18E-01 | 5.09E-02 | 2.81E-01 |
| 1189 | 1.17E-01 | 5.07E-02 | 2.77E-01 |
| 1210 | 1.15E-01 | 5.05E-02 | 2.72E-01 |
| 1231 | 1.14E-01 | 5.03E-02 | 2.67E-01 |
| 1253 | 1.13E-01 | 5.00E-02 | 2.62E-01 |
| 1275 | 1.12E-01 | 4.96E-02 | 2.57E-01 |
| 1297 | 1.11E-01 | 4.91E-02 | 2.53E-01 |
| 1320 | 1.09E-01 | 4.85E-02 | 2.48E-01 |
| 1343 | 1.08E-01 | 4.80E-02 | 2.43E-01 |
| 1366 | 1.07E-01 | 4.75E-02 | 2.38E-01 |
| 1390 | 1.05E-01 | 4.69E-02 | 2.33E-01 |
| 1414 | 1.04E-01 | 4.64E-02 | 2.29E-01 |
| 1439 | 1.02E-01 | 4.58E-02 | 2.24E-01 |
| 1464 | 1.00E-01 | 4.53E-02 | 2.20E-01 |
| 1490 | 9.86E-02 | 4.47E-02 | 2.15E-01 |
| 1516 | 9.69E-02 | 4.41E-02 | 2.11E-01 |
| 1542 | 9.54E-02 | 4.35E-02 | 2.06E-01 |
| 1569 | 9.37E-02 | 4.29E-02 | 2.02E-01 |
| 1597 | 9.20E-02 | 4.21E-02 | 1.97E-01 |
| 1625 | 9.02E-02 | 4.14E-02 | 1.93E-01 |
| 1653 | 8.87E-02 | 4.07E-02 | 1.88E-01 |
| 1682 | 8.71E-02 | 4.00E-02 | 1.84E-01 |

|      |          |          |          |
|------|----------|----------|----------|
| 1711 | 8.58E-02 | 3.91E-02 | 1.80E-01 |
| 1741 | 8.42E-02 | 3.80E-02 | 1.78E-01 |
| 1772 | 8.26E-02 | 3.70E-02 | 1.75E-01 |
| 1803 | 8.11E-02 | 3.60E-02 | 1.73E-01 |
| 1834 | 7.96E-02 | 3.49E-02 | 1.71E-01 |
| 1866 | 7.81E-02 | 3.39E-02 | 1.70E-01 |
| 1899 | 7.63E-02 | 3.30E-02 | 1.68E-01 |
| 1932 | 7.45E-02 | 3.21E-02 | 1.67E-01 |
| 1966 | 7.26E-02 | 3.11E-02 | 1.65E-01 |
| 2000 | 7.07E-02 | 3.01E-02 | 1.63E-01 |
| 2035 | 6.93E-02 | 2.92E-02 | 1.62E-01 |
| 2071 | 6.78E-02 | 2.82E-02 | 1.61E-01 |
| 2107 | 6.66E-02 | 2.74E-02 | 1.59E-01 |
| 2144 | 6.55E-02 | 2.66E-02 | 1.58E-01 |
| 2181 | 6.46E-02 | 2.59E-02 | 1.56E-01 |
| 2219 | 6.33E-02 | 2.53E-02 | 1.54E-01 |
| 2258 | 6.20E-02 | 2.47E-02 | 1.51E-01 |
| 2297 | 6.07E-02 | 2.41E-02 | 1.49E-01 |
| 2338 | 5.95E-02 | 2.36E-02 | 1.47E-01 |
| 2378 | 5.84E-02 | 2.30E-02 | 1.45E-01 |
| 2420 | 5.72E-02 | 2.24E-02 | 1.43E-01 |
| 2462 | 5.60E-02 | 2.18E-02 | 1.41E-01 |
| 2505 | 5.49E-02 | 2.12E-02 | 1.39E-01 |
| 2549 | 5.38E-02 | 2.06E-02 | 1.37E-01 |
| 2594 | 5.27E-02 | 2.02E-02 | 1.35E-01 |
| 2639 | 5.15E-02 | 1.98E-02 | 1.32E-01 |
| 2685 | 5.05E-02 | 1.94E-02 | 1.29E-01 |
| 2732 | 4.94E-02 | 1.90E-02 | 1.26E-01 |
| 2780 | 4.83E-02 | 1.86E-02 | 1.23E-01 |
| 2828 | 4.72E-02 | 1.82E-02 | 1.21E-01 |
| 2878 | 4.61E-02 | 1.78E-02 | 1.18E-01 |
| 2928 | 4.50E-02 | 1.73E-02 | 1.16E-01 |
| 2979 | 4.39E-02 | 1.69E-02 | 1.14E-01 |
| 3000 | 4.35E-02 | 1.68E-02 | 1.12E-01 |

|      |          |          |          |
|------|----------|----------|----------|
| 3031 | 4.29E-02 | 1.66E-02 | 1.10E-01 |
| 3084 | 4.19E-02 | 1.62E-02 | 1.07E-01 |
| 3138 | 4.10E-02 | 1.58E-02 | 1.04E-01 |
| 3193 | 4.00E-02 | 1.53E-02 | 1.02E-01 |
| 3249 | 3.90E-02 | 1.48E-02 | 9.91E-02 |
| 3306 | 3.80E-02 | 1.43E-02 | 9.72E-02 |
| 3364 | 3.71E-02 | 1.39E-02 | 9.59E-02 |
| 3422 | 3.62E-02 | 1.35E-02 | 9.46E-02 |
| 3482 | 3.53E-02 | 1.32E-02 | 9.29E-02 |
| 3543 | 3.44E-02 | 1.31E-02 | 9.08E-02 |
| 3605 | 3.36E-02 | 1.29E-02 | 8.81E-02 |
| 3668 | 3.29E-02 | 1.28E-02 | 8.50E-02 |
| 3732 | 3.23E-02 | 1.26E-02 | 8.18E-02 |
| 3797 | 3.16E-02 | 1.25E-02 | 7.87E-02 |
| 3864 | 3.08E-02 | 1.23E-02 | 7.60E-02 |
| 3931 | 3.01E-02 | 1.21E-02 | 7.36E-02 |
| 4000 | 2.91E-02 | 1.19E-02 | 7.10E-02 |
| 4070 | 2.83E-02 | 1.16E-02 | 6.82E-02 |
| 4141 | 2.74E-02 | 1.13E-02 | 6.54E-02 |
| 4213 | 2.68E-02 | 1.10E-02 | 6.38E-02 |
| 4287 | 2.62E-02 | 1.07E-02 | 6.28E-02 |
| 4362 | 2.56E-02 | 1.04E-02 | 6.24E-02 |
| 4438 | 2.51E-02 | 1.01E-02 | 6.26E-02 |
| 4516 | 2.45E-02 | 9.64E-03 | 6.33E-02 |
| 4595 | 2.40E-02 | 9.18E-03 | 6.44E-02 |
| 4675 | 2.35E-02 | 8.67E-03 | 6.58E-02 |
| 4757 | 2.31E-02 | 8.13E-03 | 6.73E-02 |
| 4840 | 2.26E-02 | 7.67E-03 | 6.86E-02 |
| 4925 | 2.22E-02 | 7.28E-03 | 6.97E-02 |
| 5000 | 2.19E-02 | 7.03E-03 | 7.06E-02 |
| 5011 | 2.18E-02 | 6.99E-03 | 7.07E-02 |
| 5098 | 2.15E-02 | 6.74E-03 | 7.09E-02 |
| 5187 | 2.12E-02 | 6.52E-03 | 7.05E-02 |
| 5278 | 2.09E-02 | 6.36E-03 | 6.99E-02 |

|      |          |          |          |
|------|----------|----------|----------|
| 5370 | 2.05E-02 | 6.24E-03 | 6.88E-02 |
| 5464 | 2.01E-02 | 6.15E-03 | 6.74E-02 |
| 5560 | 1.97E-02 | 6.07E-03 | 6.55E-02 |
| 5657 | 1.93E-02 | 6.02E-03 | 6.34E-02 |
| 5756 | 1.89E-02 | 6.01E-03 | 6.12E-02 |
| 5856 | 1.85E-02 | 6.02E-03 | 5.88E-02 |
| 5959 | 1.81E-02 | 6.07E-03 | 5.63E-02 |
| 6063 | 1.78E-02 | 6.13E-03 | 5.37E-02 |
| 6169 | 1.75E-02 | 6.20E-03 | 5.08E-02 |
| 6277 | 1.72E-02 | 6.29E-03 | 4.84E-02 |
| 6386 | 1.69E-02 | 6.33E-03 | 4.67E-02 |
| 6498 | 1.66E-02 | 6.32E-03 | 4.53E-02 |
| 6612 | 1.63E-02 | 6.28E-03 | 4.40E-02 |
| 6727 | 1.61E-02 | 6.24E-03 | 4.28E-02 |
| 6845 | 1.59E-02 | 6.25E-03 | 4.16E-02 |
| 6964 | 1.58E-02 | 6.28E-03 | 4.03E-02 |
| 7086 | 1.56E-02 | 6.31E-03 | 3.92E-02 |
| 7210 | 1.55E-02 | 6.36E-03 | 3.83E-02 |
| 7336 | 1.53E-02 | 6.41E-03 | 3.74E-02 |
| 7464 | 1.52E-02 | 6.37E-03 | 3.69E-02 |
| 7595 | 1.50E-02 | 6.30E-03 | 3.65E-02 |
| 7727 | 1.49E-02 | 6.16E-03 | 3.65E-02 |
| 7863 | 1.47E-02 | 5.96E-03 | 3.68E-02 |
| 8000 | 1.45E-02 | 5.72E-03 | 3.71E-02 |
| 8140 | 1.43E-02 | 5.46E-03 | 3.76E-02 |
| 8282 | 1.42E-02 | 5.27E-03 | 3.81E-02 |
| 8427 | 1.40E-02 | 5.14E-03 | 3.86E-02 |
| 8574 | 1.39E-02 | 5.06E-03 | 3.88E-02 |
| 8724 | 1.38E-02 | 4.98E-03 | 3.89E-02 |
| 8877 | 1.36E-02 | 4.90E-03 | 3.90E-02 |
| 9032 | 1.35E-02 | 4.83E-03 | 3.86E-02 |
| 9190 | 1.34E-02 | 4.83E-03 | 3.80E-02 |
| 9350 | 1.32E-02 | 4.89E-03 | 3.65E-02 |
| 9514 | 1.32E-02 | 5.21E-03 | 3.46E-02 |

|       |          |          |          |
|-------|----------|----------|----------|
| 9680  | 1.31E-02 | 6.06E-03 | 3.13E-02 |
| 9849  | 1.31E-02 | 7.17E-03 | 2.76E-02 |
| 10021 | 1.31E-02 | 8.51E-03 | 2.43E-02 |
